# Supplementary material for: Synthesis and rearrangement of a bridged thioamide
Source: Royal Society of Chemistry journal article supplement (doi:10.1039/b917508c), 2009-01-01

# Synthesis and rearrangement of a bridged thioamide

Michal Szostak and Jeffrey Aubé\*

*Department of Medicinal Chemistry, 1251 Wescoe Hall Drive, Malott Hall, Room 4070,  
University of Kansas, Lawrence, Kansas 66045-7582*

*jaube@ku.edu*

## Electronic Supplementary Information

|                                                                                                         |    |
|---------------------------------------------------------------------------------------------------------|----|
| Table of Contents                                                                                       | 1  |
| List of Known Compounds                                                                                 | 2  |
| Experimental Procedures                                                                                 | 2  |
| Alternative Mechanism for Rearrangement from <b>2</b> to <b>3</b>                                       | 5  |
| References                                                                                              | 6  |
| <sup>1</sup> H and <sup>13</sup> C NMR Spectra of New Compounds                                         | 7  |
| Comparison of <sup>1</sup> H and <sup>13</sup> C NMR Spectra of Bridged and Fused Amides and Thioamides | 11 |

### Corresponding Author:

Professor Jeffrey Aubé\*  
Department of Medicinal Chemistry  
1251 Wescoe Hall Drive  
Malott Hall, Room 4070  
University of Kansas  
Lawrence, Kansas 66045-7582

Tel: 1.785.864.4496  
Fax: 1.785.864.5326  
E-mail: jaube@ku.edu

## List of Known Compounds

The following compounds are known: lactams **1**, **4**.<sup>1</sup> Spectra of lactams **1** and **4** are reproduced from Ref. 1.

### Thionation of lactam **1**

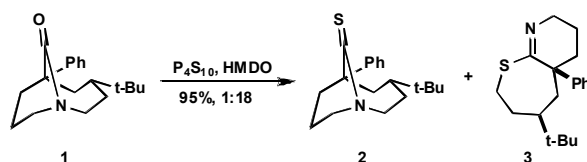

**4-tert-Butyl-6-phenyl-1-azabicyclo[4.3.1]decane-10-thione (2) and 4-tert-Butyl-5a-phenyl-2,3,4,5,5a,6,7,8-octahydrothiepine[2,3-b]pyridine (3).** 25 ml round bottom flask was charged with amide **1** (0.0200 g, 0.07 mmol, 1.0 equiv),  $P_4S_{10}$  (0.0080 g, 0.018 mmol, 0.25 equiv) and toluene (5.0 mL). After the reaction mixture was stirred at rt for 10 min, hexamethyldisiloxane (0.026 mL, 0.12 mmol, 1.7 equiv) was added and the reaction was heated at 90 °C for 22 h. After the reaction was cooled to rt, the solvent was removed and the reaction mixture was purified by chromatography (1/1 EtOAc/hexanes followed by 1/10/90  $NH_3$ /MeOH/ $CH_2Cl_2$ ) to afford **2** ( $R_f$  = 0.52, 1/4 EtOAc/hexanes) as oil (yield 5%, 0.0010 g, 0.0033 mmol) and **3** ( $R_f$  = 0.63, 1/10/90  $NH_3$ /MeOH/ $CH_2Cl_2$ ) as oil (yield 90%, 0.0189 g, 0.063 mmol). Compound **2**:  $^1H$  NMR (400 MHz,  $CDCl_3$ )  $\delta$  0.90 (s, 9H), 1.44 (q,  $J$  = 11.0 Hz, 1H), 1.68-1.77 (m, 2H), 1.90-2.02 (m, 3H), 2.17 (d,  $J$  = 10.1 Hz, 1H), 2.33-2.42 (m, 1H), 2.49 (d,  $J$  = 11.9 Hz, 1H), 3.03-3.11 (m, 1H), 3.44-3.52 (m, 1H), 3.72 (d,  $J$  = 12.2 Hz, 1H), 4.39 (dd,  $J$  = 7.2, 13.4 Hz, 1H), 7.22-7.39 (m, 5H);  $^{13}C$  NMR (125 MHz,  $CDCl_3$ )  $\delta$  21.5, 22.2, 27.1, 33.2, 37.6, 41.8, 46.3, 54.0, 57.5, 65.0, 125.1, 127.2, 127.5, 149.1, 225.5; IR (neat) 2955, 2918, 2851, 1491, 1445, 1367, 1315, 1180, 1080, 1070, 1047  $cm^{-1}$ ; HRMS calcd for  $C_{19}H_{28}NS$  ( $M^+ + H$ ) 302.1942, found 302.1955. Compound **3**:  $^1H$  NMR (400 MHz,  $CDCl_3$ )  $\delta$  0.96 (s, 9H), 1.26-1.48 (m, 2H), 1.60 (m, 2H), 1.84 (d,  $J$  = 13.0 Hz, 1H), 1.94-2.14 (m, 4H), 2.49 (dt,  $J$  = 4.6, 14.8 Hz, 1H), 2.85 (m, 1H), 3.58-3.69 (m, 1H), 3.86 (ddt,  $J$  = 1.6, 5.4, 18.0 Hz, 1H), 7.22-7.43 (m, 5H);  $^{13}C$  NMR (100 MHz,  $CDCl_3$ )  $\delta$  18.9, 27.4, 29.8, 32.0, 33.6, 39.8, 41.1, 43.9, 51.4, 51.8, 126.5, 126.9, 128.3, 146.4, 173.0; IR (neat) 2941, 2866, 2212, 1670, 1605, 1477, 1445, 1366, 1126, 1061  $cm^{-1}$ ; HRMS calcd for  $C_{19}H_{28}NS$  ( $M^+ + H$ ) 302.1942, found 302.1932.

Table 1. Influence of additional reaction conditions on product distribution.

| Entry | Reagents                                               | Conditions           | <b>2:3</b> | Yield [%]       |
|-------|--------------------------------------------------------|----------------------|------------|-----------------|
| 1     | P <sub>10</sub> S <sub>10</sub> /HMDO (0.25/1.7 equiv) | Toluene, 90 °C, 6 h  | <5:95      | 79 <sup>a</sup> |
| 2     | P <sub>10</sub> S <sub>10</sub> /HMDO (0.25/1.7 equiv) | Toluene, 90 °C, 3 h  | n.a.       | 13 <sup>b</sup> |
| 3     | P <sub>10</sub> S <sub>10</sub> /HMDO (1.3/7.5 equiv)  | Toluene, 90 °C, 15 h | <5:95      | 93 <sup>a</sup> |
| 4     | P <sub>10</sub> S <sub>10</sub> /HMDO (1.3/7.5 equiv)  | Toluene, 90 °C, 2 h  | 1:3        | 40 <sup>c</sup> |
| 5     | P <sub>10</sub> S <sub>10</sub> (5.0 equiv)            | Toluene, 90 °C, 15 h | <5:95      | 76 <sup>a</sup> |

<sup>a</sup>Isolated yield of **3**; <sup>b</sup>isolated yield of **2**; <sup>c</sup>combined yield; n.a. = not available; <5:95 indicates that **2** was not observed by <sup>1</sup>H NMR of the crude reaction mixture. Note: no conversion was observed at lower temperatures, or in CH<sub>2</sub>Cl<sub>2</sub>, THF solvents.

### Conversion of **3** to **3a**

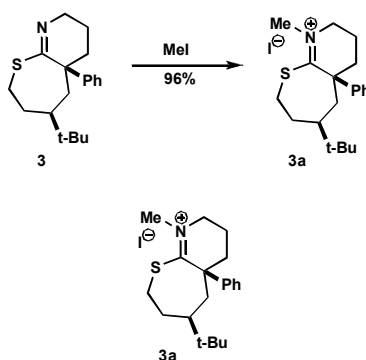

**4-tert-Butyl-9-methyl-5a-phenyl-2,3,4,5,5a,6,7,8-octahydrothiepin[2,3-b]pyridin-9-ium iodide (3a).** To a solution of **3** (0.0308 g, 0.10 mmol, 1.0 equiv) in CH<sub>2</sub>Cl<sub>2</sub> (6.0 mL), MeI (0.13 mL, 2.0 mmol, 20.0 equiv) was added at rt, and the resulting reaction mixture was stirred at rt for 24 h. The solvent was removed to afford the title compound as yellow solid. Yield 96% (0.0434 g, 0.098 mmol). Recrystallization from CHCl<sub>3</sub> provided needles suitable for x-ray crystallography (m.p. = 167-8 °C). <sup>1</sup>H NMR (400 MHz, CDCl<sub>3</sub>) δ 1.00 (s, 9H), 1.64 (m, 2H), 1.91 (m, 2H), 2.06 (m, 3H), 2.33 (d, *J* = 14.5 Hz, 1H), 2.53 (td, *J* = 2.3, 13.2 Hz, 1H), 2.97 (td, *J* = 4.1, 15.0 Hz, 1H), 3.11 (dd, *J* = 3.5, 15.0 Hz, 1H), 3.99 (s, 3H), 4.07 (dd, *J* = 5.3, 15.1 Hz, 1H), 4.49 (m, 1H), 7.21-7.45 (m, 5H); <sup>13</sup>C NMR (100 MHz, CDCl<sub>3</sub>) δ 18.2, 27.1, 28.3, 30.8, 33.4, 38.9, 41.9, 42.7, 48.9, 55.3, 58.8, 125.8, 128.2, 129.5, 143.5, 194.6; IR (neat) 2955, 2918, 2849, 2187, 1578, 1445, 1366, 1238 cm<sup>-1</sup>; HRMS calcd for C<sub>20</sub>H<sub>30</sub>NS (M<sup>+</sup>) 316.2099, found 316.2094.

### Thionation of the bridged and the fused amide with Lawesson's reagent

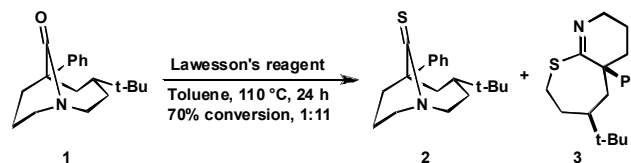

25 ml round bottom flask was charged with amide **1** (0.0200 g, 0.070 mmol, 1.0 equiv) Lawesson's reagent (0.0871 g, 0.21 mmol, 3.0 equiv), and toluene (7.0 mL), and the resulting mixture was heated to reflux for 24 h. After the reaction was cooled to rt, the solvent was removed and the reaction was analyzed by NMR.  $^1\text{H}$  NMR indicated 31:6:63 mixture of **1**:**2**:**3**. Note: the use of Lawesson's reagent complicates the purification of the final products; the lactams exhibit similar polarity to the decomposition products of the thionating reagent.

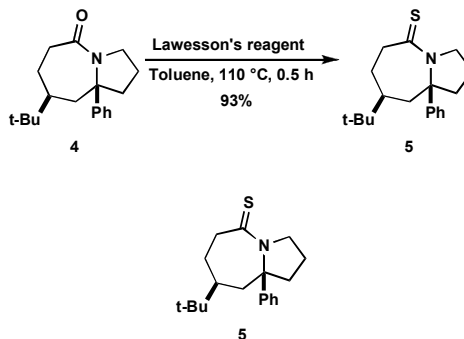

#### 8-*tert*-Butyl-9a-phenylhexahydro-1H-pyrrolo[1,2-a]azepine-5(6H)-thione (**5**).

According to the procedure described above, the reaction of amide **4** (0.0500 g, 0.175 mmol, 1.0 equiv), Lawesson's reagent (0.11 g, 0.26 mmol, 1.5 equiv) in toluene (7.0 mL) at reflux for 30 min, afforded after solvent removal and chromatography (1/10-1/4 EtOAc/hexanes), the title compound as white solid (m.p. = 152-3 °C,  $R_f$  = 0.73, 1/1 EtOAc/hexanes). Yield 93% (0.0488 g, 0.0162 mmol).  $^1\text{H}$  NMR (400 MHz,  $\text{CDCl}_3$ )  $\delta$  0.92 (s, 9H), 1.22-1.38 (m, 2H), 1.43-1.52 (m, 1H), 1.64 (dd,  $J$  = 2.8, 10.8 Hz, 1H), 1.73-1.82 (m, 1H), 2.01 (m, 1H), 2.26 (m, 2H), 2.46 (d,  $J$  = 13.6 Hz, 1H), 2.60 (td,  $J$  = 6.1, 12.8 Hz, 1H), 2.99 (ddd,  $J$  = 1.8, 5.0, 12.4 Hz, 1H), 2.87-3.97 (m, 1H), 4.09 (dd,  $J$  = 4.8, 9.2 Hz, 1H), 7.12 (d,  $J$  = 7.4 Hz, 2H), 7.29 (t,  $J$  = 7.2 Hz, 1H), 7.36 (t,  $J$  = 7.7 Hz, 2H);  $^{13}\text{C}$  NMR (100 MHz,  $\text{CDCl}_3$ )  $\delta$  19.8, 26.8, 27.0, 32.6, 39.6, 41.3, 42.7, 44.1, 56.0, 75.4, 124.8, 127.3, 128.7, 145.4, 200.5; IR (neat) 2950, 2916, 2868, 1470, 1443, 1367, 1331, 1252, 1148  $\text{cm}^{-1}$ ; HRMS calcd for  $\text{C}_{19}\text{H}_{28}\text{NS}$  ( $\text{M}^+ + \text{H}$ ) 302.1942, found 302.1953.

### Alternative Mechanism for Rearrangement of **2** to **3**

In an alternative mechanism, phosphonodithioic acid (generated from  $P_4S_{10}$  or Lawesson's reagent and traces of moisture, as shown below in equation 1, Scheme A) could protonate bridged thioamide bond. However, as noted by Curphey, phosphorus pentasulfide and its thiophosphates are strong electrophiles<sup>2</sup> and at present we cannot distinguish between the activation modes of **2**. We also note that reactions with bridged amide **1** were carried out with rigorous exclusion of moisture.

Secondly, it is possible that the electrophilic activation of bridged thioamide **2** occurs at sulfur instead of nitrogen. Although a typical thioamide bond would be expected to undergo protonation at sulfur, in analogy to bridged amides with [4.3.1] ring system which due to the non-planarity of amide bonds are protonated at nitrogen rather than oxygen,<sup>3,4</sup> we proposed that **2** would also undergo electrophilic attack at nitrogen. We note that there are no examples of bridged thioamides described in literature. Accordingly, the reactivity profile of species analogous to **2** is currently unknown. Study to address the intriguing question of reactivity of bridged thioamides is underway in our laboratories.

**Scheme A.** Alternative mechanism for rearrangement of a bridged thioamide.

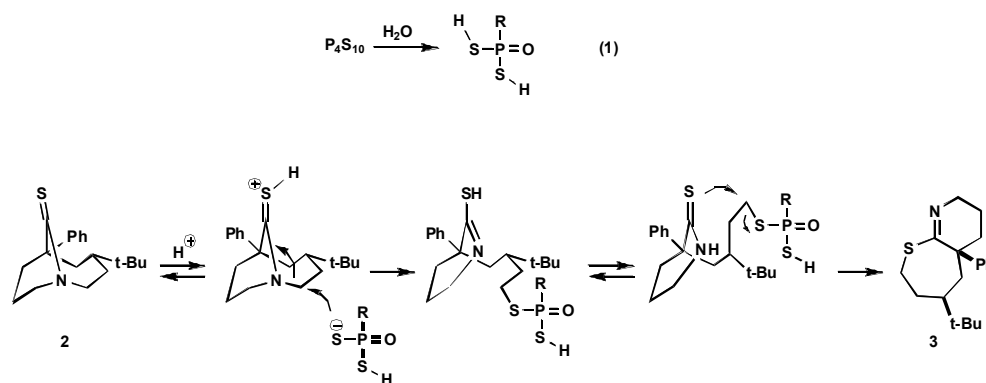

## References

1. Yao, L.; Aubé, J. *J. Am. Chem. Soc.*, **2007**, *129*, 2766-2767.
2. Curphey, T. J. *J. Org. Chem.*, **2002**, *67*, 6461-6473.
3. Yao, L.; Wroblewski, A. D.; Golden, J. E.; Powell, D. R.; Aubé, J. *J. Am. Chem. Soc.*, **2005**, *127*, 4552–4553.
4. Yao, L. University of Kansas, 2007.

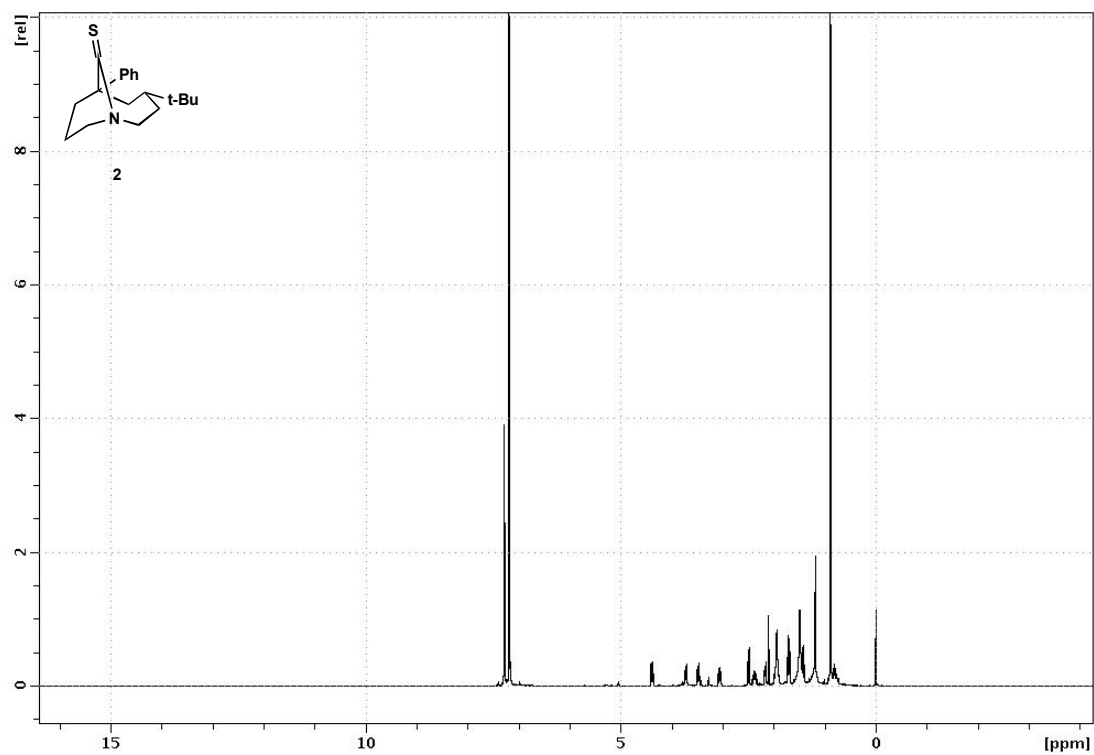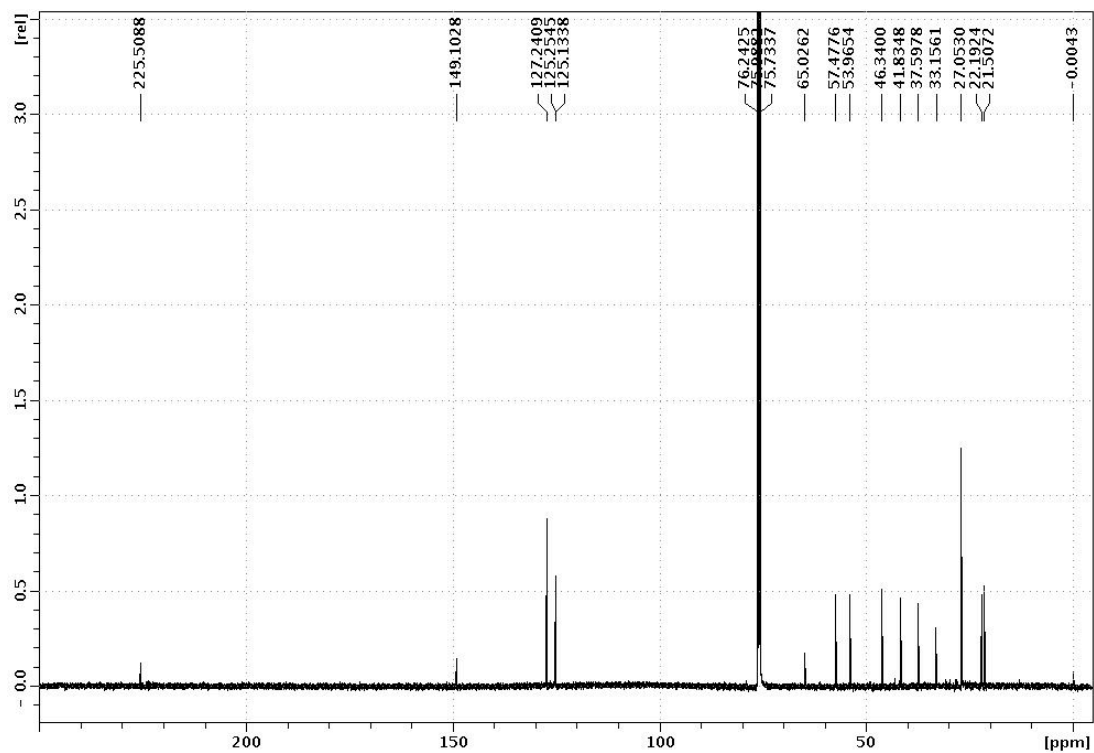

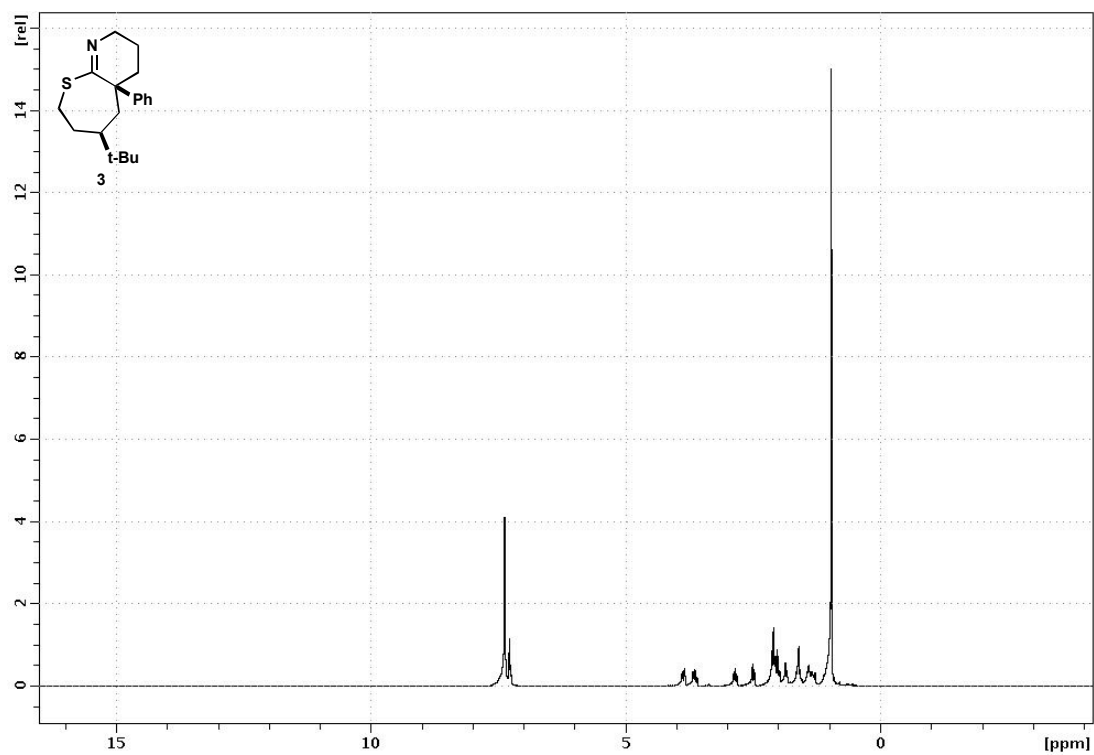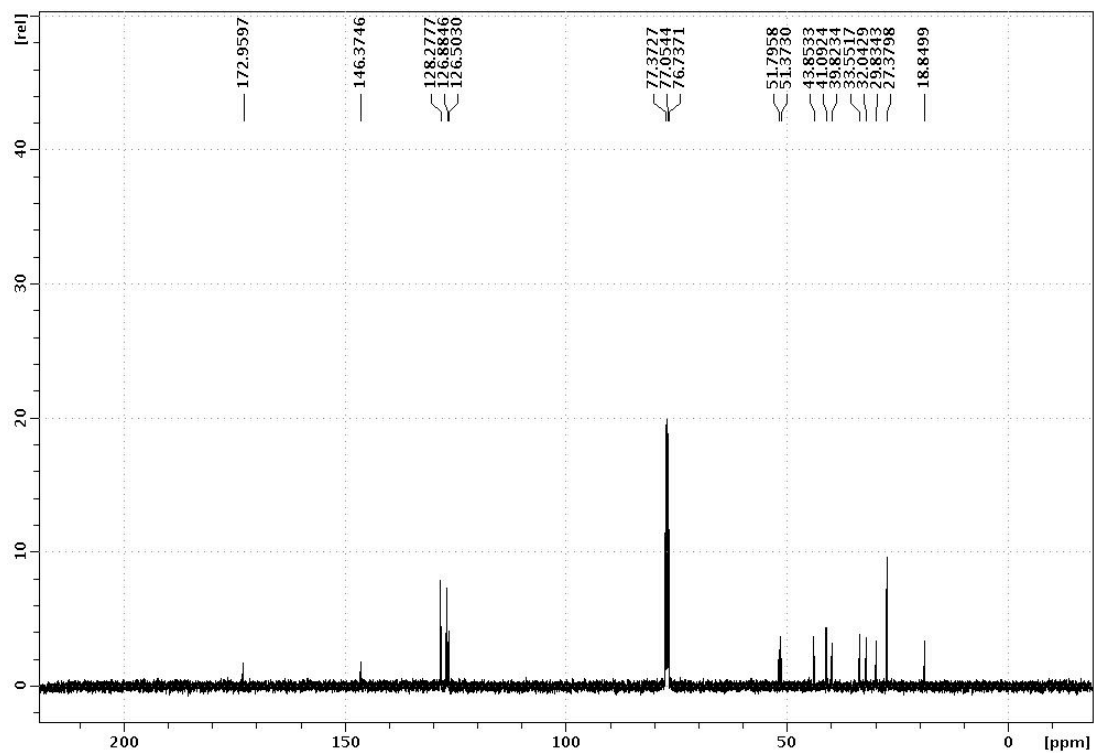



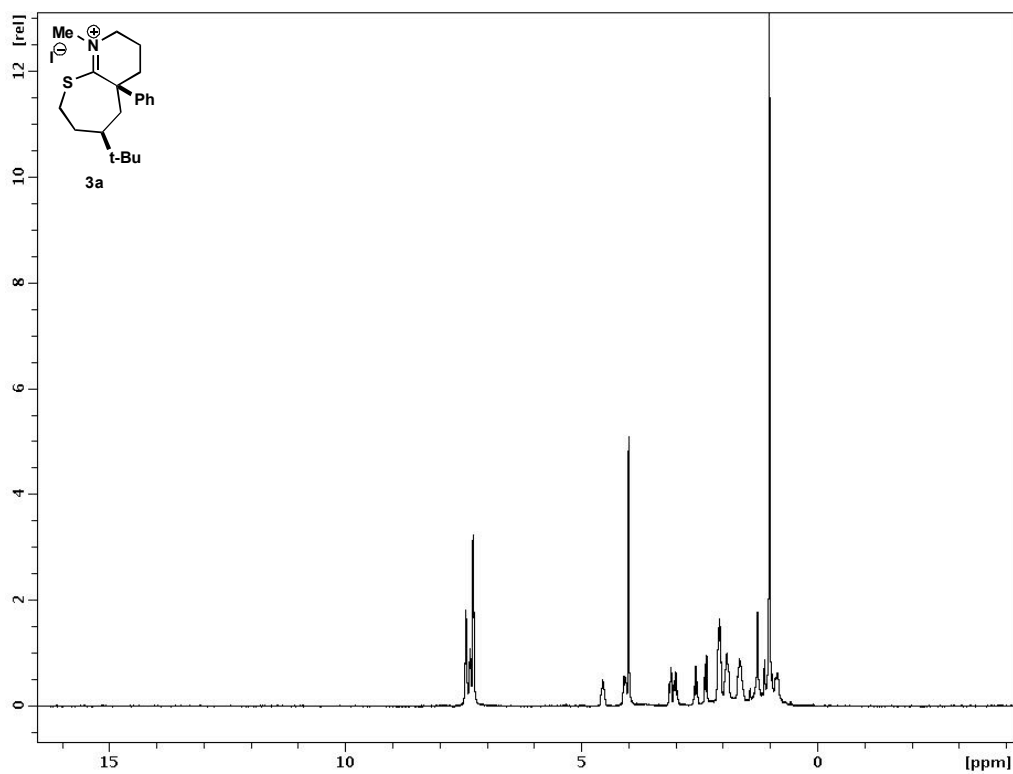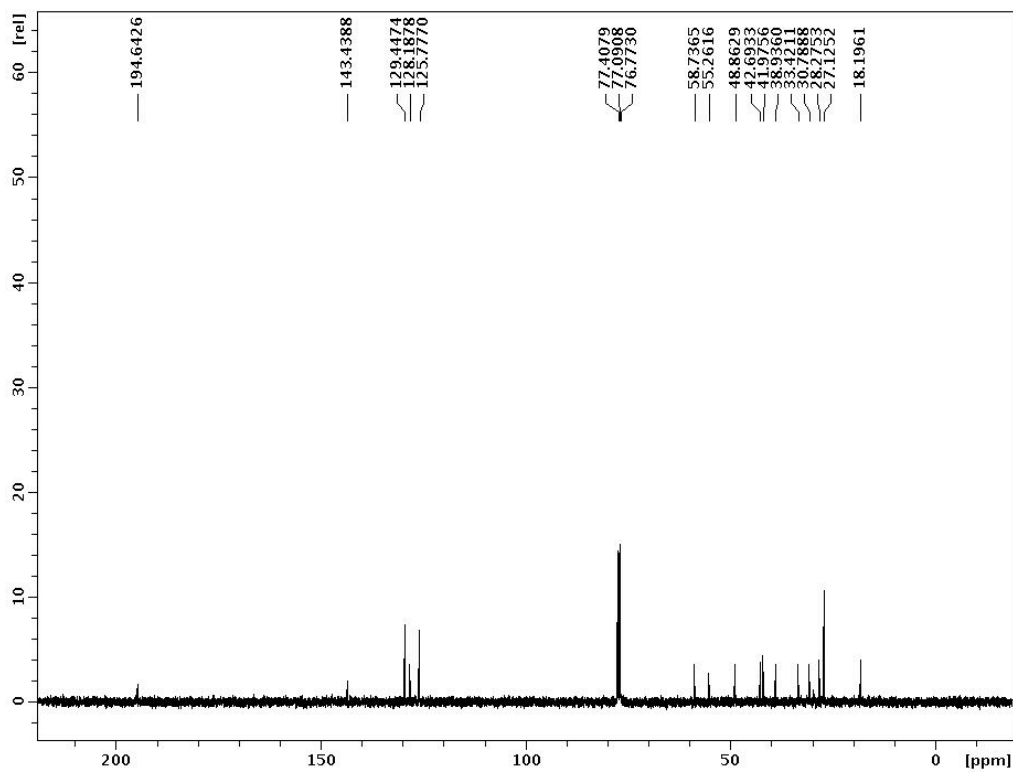

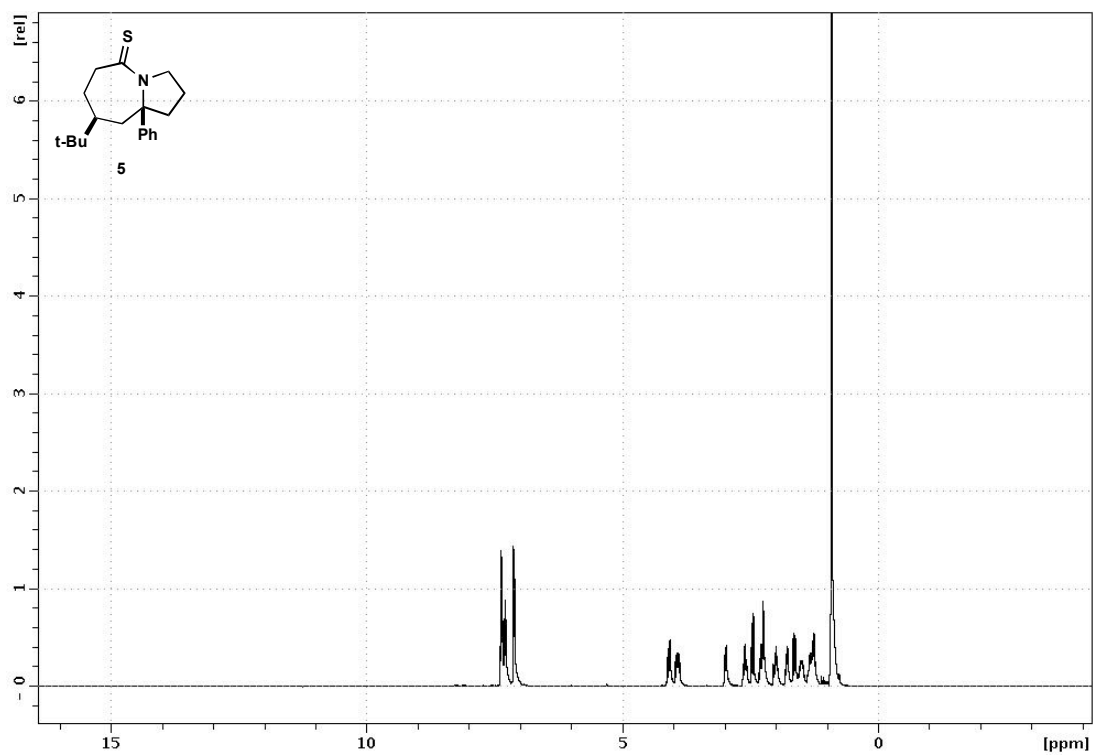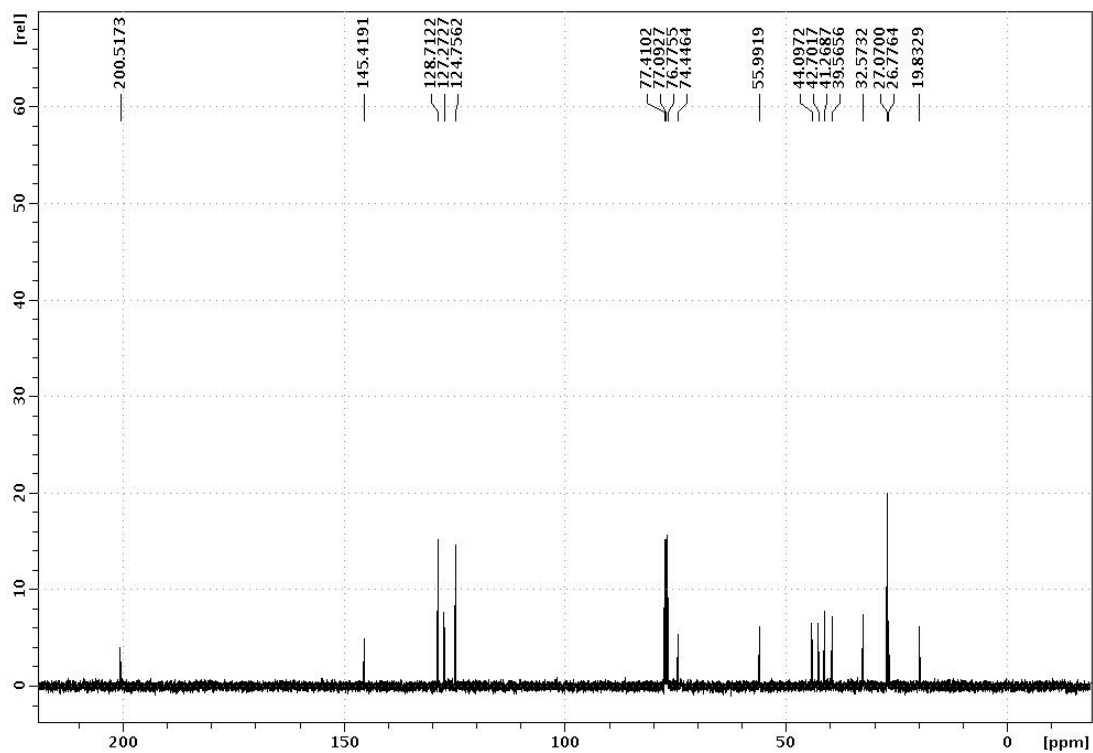

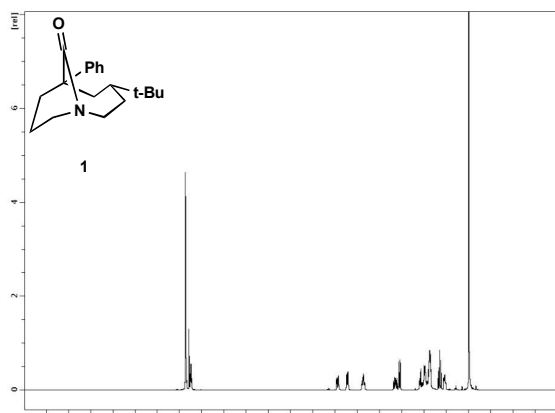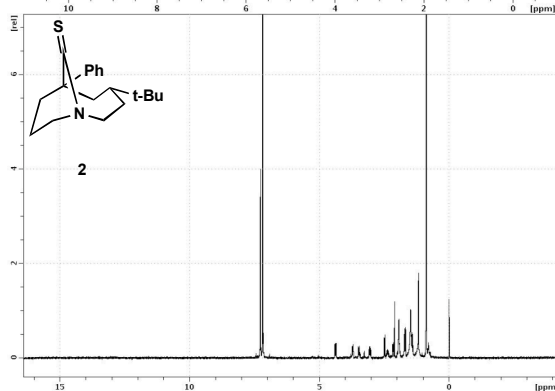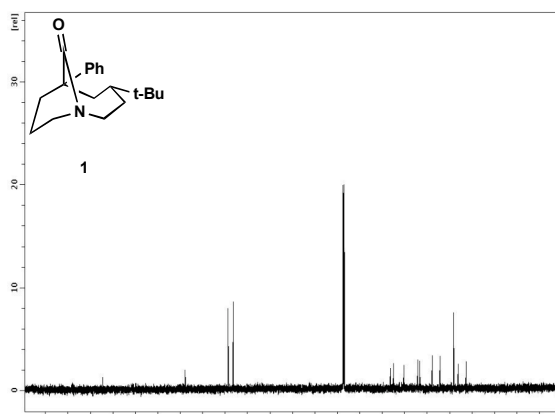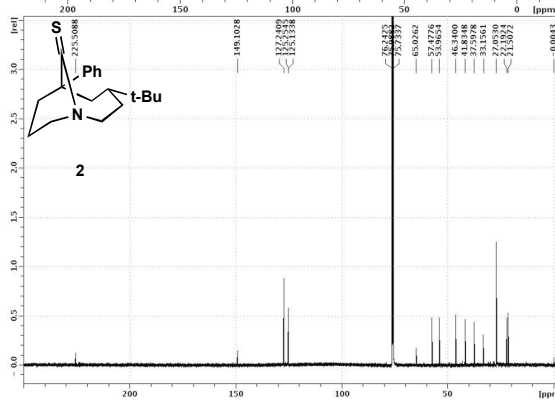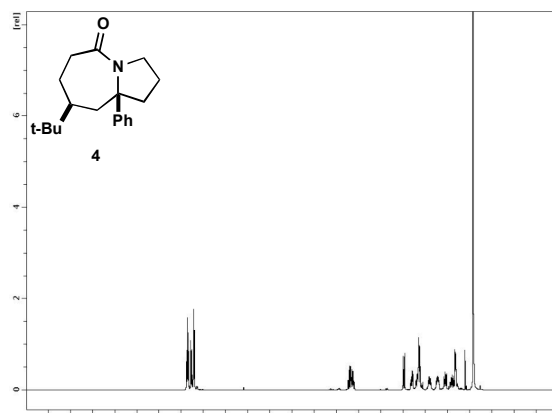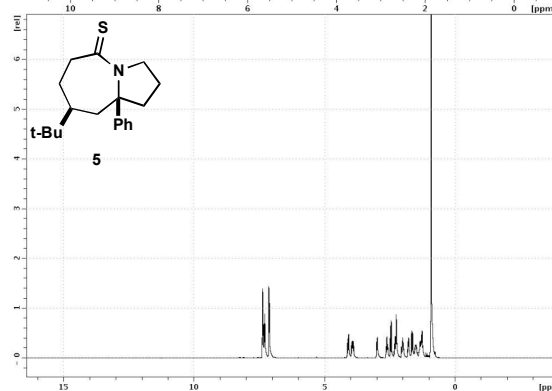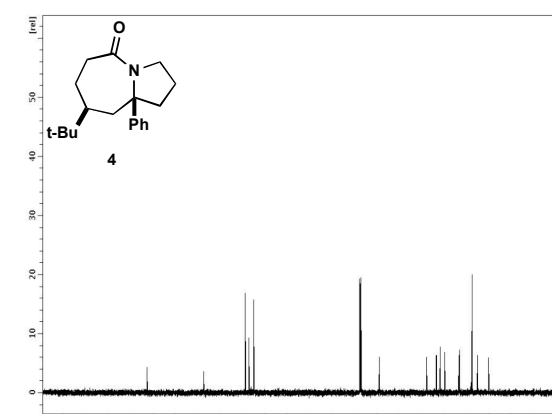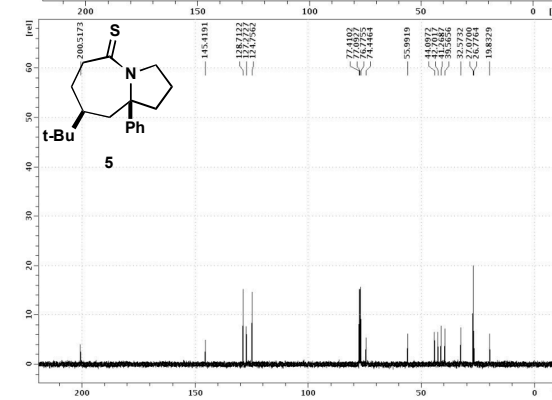

Supplement: b917508c.pdf [file b917508c.pdf]
